# Supplementary material for: Sequential neuromodulation of Hebbian plasticity offers mechanism for effective reward-based navigation
Source: eLife. 2017 Jul 10;6:e27756. doi: 10.7554/eLife.27756 (PMC5546805; doi:10.7554/eLife.27756)
Supplement: Figure 1—source data 1. — DOI: http://dx.doi.org/10.7554/eLife.27756.003 [file elife-27756-fig1-data1.xlsx]

## Sheet: Figure 1
																Figure 1a,b																								Figure 1c,d
+ Pairing - ACh											+ Pairing + ACh											- Pairing + ACh											+ Atropine									- Atropine
76.1112	72.447	106.701	91.3826	110.5	79.0965	97.2563	102.972				98.822	94.0363	100.962	75.007	104.969	103.971						101.435	99.8939	97.5392	103.254	104.834	99.436	89.8629					92.8236	141.912	78.3832	99.1156	63.5676	133.802				85.7296	98.7561	95.98	127.893	122.829
71.1681	83.2311	100.262	99.1813	103.096	82.6505	98.2273	81.0386				110.913	77.6068	111.639	100.021	109.957	102.935						99.5541	97.0156	102.298	103.662	101.476	98.7941	95.1663					87.75	135.593	89.841	82.9915	42.5678	130.835				115.538	118.186	115.721	121.398	63.7604
111.355	74.5817	82.2535	87.2575	107.39	83.1204	111.241	97.5352				97.1258	86.9994	86.6768	102.05	110.309	117.828						102.847	99.5205	81.2602	101.59	88.3654	93.6302	105.854					90.3883	112.994	85.3498	82.1842	84.2447	122.103				97.1516	100.2	92.3095	102.149	117.607
93.5324	105.562	97.3726	103.744	104.596	97.7179	92.4366	88.9553				128.377	73.3988	113.164	100.394	85.9703	98.1946						99.5297	101.974	86.6238	100.8	87.443	101.787	99.726					111.822	103.468	98.4608	76.6158	94.8173	79.165				107.019	118.972	96.7834	78.2947	110.102
105.663	91.8583	101.476	75.6496	95.1326	126.707	96.9366	102.07				96.8441	120.402	106.234	103.048	120.315	84.5443						107.87	97.7701	110.684	110.954	101.057	103.115	106.766					108.653	89.5913	110.502	75.9114	112.935	96.2958				105.324	93.5469	109.536	90.5763	95.3674
111.127	123.934	97.2224	89.0312	99.251	116.163	101.543	113.98				118.45	120.221	108.853	77.6003	94.1969	88.7663						101.969	99.2729	99.4607	102.951	87.2583	95.4334	98.66					96.1955	70.3389	106.736	127.971	90.2083	52.2359				93.727	104.642	111.661	85.262	83.3963
97.5672	137.959	112.908	111.209	106.593	97.5417	93.3366	102.906				97.3787	88.0967	86.2259	104.678	101.751	103.22						90.303	110.686	106.372	104.927	105.84	92.3581	100.954					97.2573	90.912	80.7437	119.991	88.181	101.533				99.3878	85.4589	100.196	123.406	103.739
103.071	109.29	111.255	87.3207	77.8347	112.198	94.805	100.036				95.2407	100.056	96.9958	105.797	82.359	111.664						99.7841	99.5734	107.121	98.5834	95.9378	111.48	103.493					94.7436	63.5918	106.93	118.011	99.8673	90.9192				99.7538	92.1396	96.1487	81.8377	98.9026
121.962	111.624	98.9562	119.445	80.7925	96.9542	104.456	103.887				77.0064	96.9758	87.6185	121.86	103.903	96.0706						101.711	102.591	105.926	85.5276	116.559	104.454	97.3621					110.246	74.2819	113.579	101.177	110.104	104.648				105.56	96.636	94.0973	105.338	69.6576
108.442	89.5135	90.6915	102.774	114.814	107.851	109.761	106.619				79.8429	142.207	101.631	109.544	86.2704	92.807						94.9985	91.7035	102.715	87.751	111.23	99.512	102.156					110.121	117.317	129.475	116.032	115.349	88.4627				90.8088	91.4633	87.566	127.893	134.639
108.977	96.4927	100.736	100.635	114.099	102.681	130.082	118.974				85.4981	158.194	108.489	76.5941	71.3798	92.3667						102.061	84.1523	86.9013	83.0169	82.0948	98.1248	110.891					109.215	136.094	122.782	116.834	104.74	45.2465				90.2874	103.445	110.294	124.233	79.6041
105.864	98.9592	107.128	122.934	124.024	109.613	116.677	109.621				83.3387	138.402	88.9714	88.5113	80.1342	73.1475						106.335	98.9818	103.351	90.1165	101.072	94.7404	110.273					112.275	113.683	122.985	158.605	99.5536	73.3806				95.2863	75.342	123.826	81.0109	69.8987
123.94	122.131	103.961	102.611	147.097	99.0395	112.97	104.737				97.7564	112.097	87.5324	87.8522	74.8877	70.5312						105.076	90.9387	78.7365	82.3443	107.027	103.272	123.597					103.751	112.318	124.285	100.077	120.003	42.5489				88.5976	64.7225	91.497	104.393	71.5375
113.425	118.57	86.5533	120.894	140.935	94.5458	111.194	120.18				50.2554	111.402	96.9494	95.2245	89.2816	59.9373						101.906	99.3726	70.685	73.8435	98.3183	99.6479	116.426					91.0127	141.667	126.292	96.2775	121.985	62.6924				89.8963	92.761	102.015	99.7875	58.0077
116.124	109.633	95.3037	159.31	153.255	96.2494	130.129	93.3663				88.7801	122.375	106.837	94.7648	87.5225	65.7393						109.203	98.4868	73.1612	83.5105	97.4101	92.8537	127.987					105.25	124.389	143.991	120.207	112.467	87.1186				87.9809	76.2102	105.32	116.556	99.706
125.556	129.298	86.854	173.382	142.654	102.682	108.281	105.179				65.9419	114.956	77.0741	109.934	75.0222	53.4877						102.37	99.2327	61.9654	86.7668	92.628	99.8085	119.839					108.95	102.31	121.668	101.368	125.703	110.201				89.6405	69.9409	106.375	103.684	80.3111
130.446	134.143	114.873	167.7	149.812	95.3681	104.361	106.419				68.3257	85.8216	85.1184	102.683	85.0804	41.8317						115.032	89.5588	54.6024	81.3003	93.7806	92.5199	118.144					100.629	127.85	126.142	109.723	129.122	133.922				88.1264	46.8649	55.7464	103.921	84.9388
108.268	133.424	100.112	187.964	154.212	103.533	123.332	118.477				59.4207	83.4659	79.2427	106.222	78.406	34.4497						113.981	81.5722	57.0548	79.2392	103.06	95.2458	118.162					93.1827	118.953	128.352	106.185	100.476	134.58				98.1243	64.0828	73.0284	95.5362	60.884
129.537	106.099	109.51	158.241	137.466	101.83	113.397	110.704				50.0582	76.9827	66.271	71.3894	68.0478	47.6127						105.598	92.8989	61.4586	76.0066	95.4787	80.2873	116.094					100.723	99.3403	123.548	141.423	114.599	128.017				97.2452	59.8057	80.6133	71.2092	74.5799
105.556	140.348	99.8231	158.132	161.437	86.7332	101.01	111.351				50.3731	95.3449	69.8323	92.9694	70.1795	32.0926						113.566	88.5704	53.8437	92.5071	95.9389	90.4869	121.406					94.3223	126.597	120.917	135.406	114.794	117.561				83.0872	54.9803	66.3314	66.2496	55.8224
118.502	118.824	105.591	174.355	129.846	97.7473	101.484	114.999				65.2221	113.657	79.7533	67.7474	70.614	55.3268						109.044	80.0139	66.3282	89.2545	103.178	98.0539	117.234					92.683	133.12	121.863	116.366	140.503	122.502				91.8768	60.2444	67.8952	21.6108	47.1454
139.878	147.46	104.273	151.9	134.742	97.336	99.4825	104.847				71.1089	101.144	68.4263	66.3162	70.8727	49.6802						99.365	86.5415	63.4093	112.366	100.575	100.865	103.746					115.085	132.132	109.264	122.274	125.517	131.614				93.5415	66.6509	78.002	24.0907	52.6729
126.585	121.423	102.794	157.072	114.716	102.975	111.123	123.378				58.0809	88.1975	81.7361	75.9783	81.9967	37.4025						106.718	92.987	74.3229	98.4564	110.904	96.5543	96.5553					97.4757	110.027	121.562	124.695	127.899	124.903				89.7208	56.3695	73.2185	90.4582	13.0156
165.823	136.687	102.516	158.489	125.434	102.652	101.946	104.737				67.157	110.174	70.3826	85.3456	77.5367	37.817						107.759	86.4036	67.6698	101.469	122.419	106.1	106.903					92.2304	112.021	136.317	126.243	126.062	137.158				91.5258	63.9731	71.4185	60.5809	38.0023
188.067	138.136	99.7076	156.264	103.276	96.4255	112.591	118.971				61.541	106.761	72.6838	87.6874	77.4851	37.817						103.942	78.7798	60.0221	109.033	114.035	97.3042	101.826					100.02	124	115.639	126.896	116.613	148.513				80.8008	62.8764	64.8596	68.8474	57.7026
146.184	164.46	103.187	153.592	103.869	92.2254	115.895	114.913				62.9093	108.845	82.4856	72.0753	84.0559	49.6542						103.574	85.9463	69.3726	108.203	107.191	113.974	92.2154					86.9851	104.464	129.448	156.167	138.871	123.976				75.7066	73.6787	74.0832	49.3622	22.5281
156.965	140.315	107.949	158.746	102.115	97.3067	114.249	143.443				87.7146	116.204	70.4688	77.5309	73.4597	49.2138						100.415	94.6754	58.1989	111.754	123.618	104.976	99.2859					95.3527	133.184	128.732	128.546	139.112	208.758				86.8477	70.7633	81.0499	73.3349	61.9608
167.733	151.077	100.424	155.862	106.866	96.5429	121.97	120.622				109.587	116.546	77.8367	70.8004	77.8575	43.5413						103.552	83.5748	64.0405	113.886	107.782	98.194	101.572					113.368	123.394	138.881	147.421	149.54	206.432				97.8384	77.6085	81.3841	53.4956	60.5948
151.621	159.715	80.589	148.903	106.46	95.3388	114.557	132.293				78.1076	84.6338	102.613	72.1968	75.3638	47.3748						93.821	87.7463	58.8695	105.342	111.655	108.631	99.689					92.6051	122.504	117.301	148.388	131.74	158.747				91.3403	50.7763	76.8092	69.6741	40.8625
162.616	164.648	83.837	147.757	145.123	93.5765	133.634	111.907				99.6629	93.3114	97.8977	71.633	75.5086	51.5968						108.612	83.8663	58.699	112.916	125.436	87.733	94.0022					83.3321	103.59	122.243	130.439	128.635	169.556				78.028	49.9995	81.8687	59.9906	20.1983
177.566	127.319	100.309	140.739	110.91	107.939	130.78	115.831				46.9522	83.1839	102.885	61.4245	79.7513	45.4064						101.629	85.8137	71.5139	102.885	117.46	102.77	88.1924					96.1644	129.056	138.13	138.377	106.176	199.776				82.1296	49.0125	65.5403	81.7194	40.8625
151.822	158.056	104.158	149.521	142.701	93.8703	123.273	117.717				69.8153	57.4626	85.3239	53.4711	81.8726	40.0705						103.134	88.1256	85.0009	114.307	108.543	83.6551	95.6803					97.8503	140.177	132.869	120.531	117.717	176.962				95.0356	67.3088	64.9178	29.5229	41.5214
168.468	144.12	94.1129	136.622	137.594	84.3834	124.895	127.896				74.7008	45.2716	73.1415	65.631	64.1155	46.9344						99.438	98.4545	87.0515	112.767	115.107	89.2459	96.4476					112.088	115.24	126.884	130.824	138.971	169.537				104.973	53.3901	71.6914	45.347	70.5573
156.498	145.867	109.937	120.443	139.09	96.8662	107.049	115.206				59.3993	56.0733	89.7804	59.6378	56.2926	35.3045						103.386	89.5387	65.9002	104.642	120.158	99.7536	93.4069					114.086	146.611	146.537	133.95	128.431	140.421				98.7059	57.7951	64.418	77.7042	54.5531
155.936	143.932	80.0111	127.046	142.482	91.5206	127.382	126.439				52.946	58.6808	84.7404	56.4287	57.5757	40.4072						101.213	86.2635	60.8231	109.579	119.15	89.3251	90.3394					102.487	122.765	127.07	124.371	131.558	196.401				95.517	66.5594	87.9492	67.0761	58.8433
158.047	152.459	89.8362	145.337	122.933	89.6702	107.476	140.897				55.0912	61.0264	79.2426	54.1129	64.2293	44.1888						95.1812	86.88	69.6737	99.5937	120.481	103.121	97.5781					107.966	142.088	136.998	145.941	126.503	156.763				87.2889	46.609	77.4286	53.9677	59.438
159.263	157.956	114.48	152.586	118.002	104.033	126.505	145.933				54.0221	71.5968	74.249	65.8652	69.9724	43.4377						98.2401	89.1463	73.5387	92.8288	115.265	90.7836	94.1938					97.5381	150.762	180.115	130.711	122.931	168.175				81.7986	47.6234	71.3511	79.594	29.0682
143.138	150.911	72.9601	138.802	137.258	106.441	109.761	145.899				42.8007	74.0934	66.702	67.6519	70.8934	42.8679						102.035	89.2546	71.3598	91.7289	106.381	103.227	93.1406					115.179	125.624	148.032	146.804	122.081	128.277				87.5647	48.8754	80.2497	55.6212	72.6784
131.394	155.092	94.2286	122.93	149.664	96.9837	96.2971	124.432				54.8238	68.8587	89.3759	59.1868	66.0921	51.9336						94.0322	86.438	70.3897	102.006	117.799	86.6161	91.454					93.8383	137.366	166.385	167.207	111.699	194.557				96.8457	49.9813	59.8921	84.908	59.5181
138.903	141.62	92.6103	132.294	143.189	100.596	119.069	133.716				68.7214	64.3687	95.5832	64.2693	62.2943	37.9465						98.3482	77.7832	69.3029	101.8	112.412	90.675	99.6147					101.956	114.257	157.102	158.147	108.544	174.645				95.7577	46.5176	54.0139	42.2766	37.7773
157.807	142.007	121.277	137.349	125.837	93.0772	115.09	143.512				46.1576	77.5868	80.5292	60.0107	65.7919	41.1325						95.165	75.6262	62.8995	103.016	109.865	90.7322	94.8177					93.807	137.73	135.062	152.553	124.822	182.904				92.9498	51.4344	44.821	84.7898	63.2623
131.14	141.863	127.9	144.462	110.379	111.082	127.5	133.82				60.4542	64.4291	73.7052	62.4566	55.9097	34.657						94.7056	82.709	82.2525	109.919	119.317	91.344	111.076					123.452	131.43	142.117	157.715	109.531	180.633				100.566	65.4902	55.1852	88.5687	12.4051
136.271	143.898	148.972	143.018	122.597	118.483	120.987	137.177				50.0239	71.4961	90.9609	64.0698	65.0883	52.9179						93.115	81.9471	78.4658	112.725	100.785	97.9629	101.813					105.234	100.106	156.589	146.254	119.394	164.383				96.0284	52.0466	51.8122	67.0761	49.3628
178.474	172.346	151.052	144.769	71.5555	104.679	110.815	141.64				45.3665	68.5868	82.4988	59.8893	64.2501	43.6189						104.281	81.563	75.6518	102.927	113.542	87.2194	99.6612					101.909	98.0578	147.28	144.177	115.681	188.846				100.3	57.5027	58.5122	45.5834	11.4248
144.634	150.258	137.898	155.591	115.201	126.355	136.571	148.185				44.472	62.2446	84.0175	72.7171	52.6915	39.5265						112.097	74.7313	88.2211	121.046	121.655	87.4444	97.612					90.9815	66.246	149.022	146.115	120.367	175.331				99.0368	58.1698	59.6406	73.6891	6.21862
142.042	177.567	127.599	161.143	102.701	123.418	120.786	160.333				39.5509	51.4426	90.3375	69.404	57.3998	37.0918						104.109	71.3404	91.138	122.481	100.246	97.6946	101.433					80.7094	76.582	148.818	159.407	115.203	194.659				90.874	53.4907	48.7796	78.8853	9.1591
160.853	176.693	139.655	156.729	120.632	106.382	117.541	161.884				59.6987	67.6606	93.7263	60.8694	56.6651	48.1259						107.616	78.4436	69.8662	114.678	96.9446	87.4023	96.9445					96.867	77.102	159.153	133.698	123.64	181.449				74.5183	60.1895	44.4285	53.9677	23.203
156.765	175.167	135.205	151.778	92.1826	115.84	118.583	146.783				58.6581	79.7512	96.6842	59.1608	59.5003	47.8152						97.7429	86.2618	76.7319	103.346	89.0979	91.7272	82.9188					93.5262	107.395	167.322	138.855	137.799	194.566				76.7746	55.4281	38.7097	58.1011	33.5673
155.789	153.267	132.616	138.234	142.033	99.392	97.3036	178.121				43.7415	83.1741	106.227	67.8861	43.9993	52.8402						97.671	85.0589	84.7785	101.524	95.1446	95.9939	87.0825					78.836	99.6465	162.265	157.597	149.417	200.99				79.793	63.8908	60.95	51.6063	78.1418
137.486	127.673	161.802	144.615	132.811	107.528	108.352	152.734				57.051	92.4557	92.0618	55.2317	54.875	40.2001						93.4604	83.4746	69.6444	105.531	92.0107	94.9585	87.9437					131.492	98.3035	155.325	115.718	115.744	181.495				86.0405	50.8221	46.8202	54.9127	46.8562
141.214	149.174	165.732	143.103	123.383	95.9263	112.994	134.784				43.5134	80.2041	95.0527	74.0529	48.4281	32.0408						97.9355	78.6061	73.5637	99.84	94.1418	103.294	90.9399					131.586	118.975	161.532	131.827	140.935	154.798				99.7588	52.2934	57.626	68.1389	57.3489
152.276	141	167.64	144.457	106.405	117.397	111.893	174.512				65.3824	59.4662	100.577	65.4229	50.3839	43.36						92.9267	81.3384	66.694	104.567	87.6321	91.1865	90.7806					127.355	131.462	156.722	134.624	151.653	177.889				90.7586	58.3891	50.2545	60.463	65.0136
162.469	158.078	156.104	151.196	99.9308	100.538	121.638	154.952				75.1855	80.7478	84.3226	74.4085	52.2673	30.9011						91.4316	93.582	85.3858	96.6887	91.7458	78.311	95.9714					135.629	119.515	150.825	136.202	141.767	151.099				102.647	53.8379	32.997	41.45	32.6674
160.011	156.331	150.532	155	123.899	114.724	122.444	136.459				121.083	61.1774	93.1627	65.6484	46.1827	46.002						97.8177	81.0691	83.7494	104.754	87.2121	86.8691	94.8471					143.466	114.031	131.084	143.442	126.24	139.197				97.337	58.4257	57.8959	43.6938	87.7187
184.046	172.866	176.378	170.219	124.004	113.109	122.361	153.422				71.2051	83.6672	75.8935	61.0342	50.1252	38.4905						102.938	77.8858	59.9201	112.878	90.1646	92.1279	86.5003					132.054	104.186	143.461	130.305	128.662	143.897				94.1381	51.8548	35.116	53.6137	27.2846
154.921	165.986	158.704	150.546	114.619	102.212	116.558	147.95				68.169	77.3954	76.3711	64.3995	42.3746	33.7245						101.374	84.7573	64.3492	95.7065	96.1762	99.3769	94.1342					126.996	127.496	147.289	117.142	141.826	157.357				98.0491	56.3694	41.8833	75.4603	34.2744
158.809	174.359	172.957	147.337	117.127	133.316	120.312	119.392				49.0261	67.9828	87.1875	61.0949	38.2562	41.3397						101.252	79.0575	66.3457	102.657	89.5388	99.0145	101.066					131.461	122.784	129.749	132.824	148.226	130.9				90.6885	61.6427	41.313	104.156	55.8868
174.373	145.381	190.33	125.191	95.5663	112.756	131.053	152.935				52.903	92.8382	86.8095	77.4701	37.9871	44.8623						92.5159	78.9662	63.2034	105.11	86.1998	78.5281	108.549					127.34	98.144	137.281	144.547	158.526	155.039				75.4559	75.6984	35.1588	68.8471	61.9446
149.737	127.418	153.815	133.202	98.8016	110.347	108.08	182.522				57.2934	99.5631	92.3072	60.5486	46.2861	44.94						96.3281	89.145	59.7757	107.915	85.3355	86.9036	99.3157					146.338	128.265	160.135	148.645	163.139	160.583				71.896	65.3987	36.6461	79.3573	44.3817
169.777		193.046	136.338	115.939	118.248	113.539	178.364				43.4387	87.3417	97.8845	59.0827	45.3445	56.0261						100.826	88.634	63.3533	100.919		95.8191	90.4843					150.647	112.244	133.365	126.495	157.88	152.23				79.5574	69.1823	35.6823	68.1389	15.217
