# Supplementary material for: Sequential neuromodulation of Hebbian plasticity offers mechanism for effective reward-based navigation
Source: eLife. 2017 Jul 10;6:e27756. doi: 10.7554/eLife.27756 (PMC5546805; doi:10.7554/eLife.27756)
Supplement: Figure 1—source data 2. — DOI: http://dx.doi.org/10.7554/eLife.27756.004 [file elife-27756-fig1-data2.xlsx]

## Sheet: Figure 1 - figure supplement 1
+DA; +10 ms								+ DA; -20 ms									+ DA + ACh; +10 ms											+ DA + ACh; -20 ms
116.111	88.6302	92.4827	145.58	104.839				104.637	85.3547	90.2302	94.5983	99.0226	87.8461				103.099	120.361	119.795	86.5704	133.881	86.7261	101.286	116.111				99.4632	61.4622	88.135	102.478	72.9871
79.7839	73.3213	89.6861	103.096	91.4475				115.897	76.5713	84.7916	92.6319	104.41	86.8448				109.031	109.767	111.379	95.077	109.756	95.4386	113.001	79.7839				98.7677	76.0508	74.2952	96.1744	78.0782
82.2292	102.686	66.6353	125.389	104.649				119.673	87.658	105.095	82.2602	95.5514	91.6515				107.436	98.789	103.296	116.332	98.485	84.4455	124.717	82.2292				109.979	85.7404	99.621	103.551	106.996
89.8338	87.3232	94.3373	88.8391	95.9257				89.0969	94.8106	85.8906	103.299	98.717	92.3636				121.233	102.552	109.234	81.8421	85.4291	112.779	133.482	89.8338				99.457	106.471	107.941	95.3841	100.426
113.139	97.5112	101.005	102.332	113.182				103.355	107.793	105.912	103.63	91.5528	94.2776				100.951	100.751	92.5947	110.812	91.8274	160.661	94.3205	113.139				104.678	91.086	107.123	87.1423	88.2889
91.3935	103.778	98.2969	83.7153	102.709				93.8802	108.564	115.183	99.036	109.575	98.7393				100.768	117.65	81.1146	98.4593	86.9606	143.067	94.4119	91.3935				96.0577	99.439	105.722	108.5	135.278
106.94	112.211	101.55	67.2698	87.4068				93.3308	95.6148	108.42	118.909	105.326	104.814				92.3078	99.4399	78.2158	100.586	118.869	95.8007	84.3083	106.94				111.003	135.376	98.1609	107.013	103.824
100.192	102.471	99.4598	95.2094	106.735				91.6373	119.419	84.1153	113.532	99.4391	119.969				87.2516	79.1882	72.4183	120.043	75.411	79.2687	82.8264	100.192				104.282	130.325	121.438	106.072	95.6535
108.845	123.957	124.262	78.6777	102.286				91.8892	118.406	107.293	94.668	94.5241	125.288				88.8092	90.3529	102.836	103.312	90.144	53.0711	97.5917	108.845				100.034	102.702	104	83.5481	107.837
111.532	108.111	132.284	109.891	90.8202				96.6035	105.809	113.07	97.4349	101.883	98.2052				89.1146	81.15	129.117	86.9664	109.237	88.7414	74.0554	111.532				76.2783	111.347	93.5643	110.137	110.632
65.9995	91.7099	168.862	42.3918	95.8673				98.4575	106.346	154.451	101.43	89.9224	101.276				89.456	49.8315	83.2745	93.2558	81.2587	69.7817	49.8123	65.9995				92.6694	59.4887	109.267	114.613	63.9083
74.6856	131.137	155.055	74.9152	104.591				85.5037	135.036	163.102	136.277	106.298	127.58				96.7905	30.6854	87.4869	69.1952	78.8664	52.8296	35.4221	74.6856				104.839	75.9536	116.102	109.328	96.5198
67.4756	139.535	173.013	118.841	96.4218				106.033	141.626	162.891	133.753	103.105	115.908				100.958	29.8293	76.5813	70.598	79.0942	37.227	28.6593	67.4756				108.363	51.225	90.0079	111.529	74.2892
73.0246	118.961	170.849	143.052	79.9089				94.7728	137.901	192.169	125.748	98.2173	129.405				87.2855	19.155	96.1448	81.6724	85.752	38.8681	24.1917	73.0246				105.688	68.3388	134.314	110.287	97.6139
70.6243	105.604	171.63	120.294	84.3727				100.174	126.098	200.552	121.572	96.4401	112.514				97.4284	30.6408	80.9229	75.3489	59.0454	40.1231	20.9323	70.6243				101.075	44.2317	131.949	113.373	90.3525
71.8346	140.967	185.716	108.099	87.8298				82.3912	150.839	152.056	121.641	121.015	122.862				82.4567	25.201	86.5675	50.3156	63.3425	30.1919	4.90577	71.8346				106.722	42.5806	108.183	113.599	50.0646
90.7308	151.62	156.866	91.9525	81.499				97.6336	146.585	158.79	129.664	107.159	119.313				91.4628	34.0385	75.9299	60.7	72.8986	8.16937	-6.4674	90.7308				107.255	77.5269	114.821	105.658	84.0286
86.701	117.69	175.206	140.232	98.8432				110.404	132.732	145.898	119.327	129.485	111.702				82.2056	60.2204	61.8448	47.974	83.7963	10.1364	8.27969	86.701				108.813	54.2164	137.476	105.207	64.968
103.553	139.355	163.519	98.4835	82.4326				113.471	144.095	159.227	131.213	124.514	109.733				78.1911	63.2435	67.7445	84.4099	80.5687	13.6359	22.2284	103.553				114.345	65.5998	126.212	124.833	68.9812
112.819	120.179	203.689	99.5692	89.5949				116.629	138.915	156.24	139.513	127.68	113.416				76.464	66.4985	54.3233	49.4476	72.348	55.5448	10.3242	112.819				109.833	58.7621	152.469	101.029	59.409
129.675	137.278	179.887	136.056	79.9673				108.939	142.893	143.686	117.413	135.899	119.446				64.1492	55.8955	80.6037	74.3196	84.8786	57.2945	40.3228	129.675				91.6535	66.1808	146.324	95.6853	88.4206
104.849	130.797	185.392	89.2872	94.7589				125.669	151.027	169.513	165.826	115.85	118.356				59.4629	48.0747	68.7532	64.6931	64.7221	81.115	80.5693	104.849				93.8466	65.93	128.133	110.4	49.3353
134.969	137.69	170.526	92.165	79.3838				133.451	140.535	183.419	158.726	126.18	127.825				78.9615	42.091	58.0011	84.6813	74.0504	95.4265	58.5964	134.969				87.3613	71.4468	119.623	143.914	82.6215
134.196	110.636	160.958	93.4229	94.5983				136.403	158.047	163.412	166.591	125.736	122.617				77.543	47.7181	50.8753	78.4824	77.3792	78.5084	54.9902	134.196				58.5087	71.7187	102.966	87.9326	73.8908
139.098	109.937	155.35	77.4886	85.7147				141.507	163.998	158.297	195.427	133.4	120.359				88.8702	30.8994	44.848	55.1232	69.8609	89.4655	66.1741	139.098				45.4214	75.2348	132.779	108.5	77.0856
139.227	113.375	159.368	78.1549	58.6261				93.2394	165.398	154.141	200.526	143.341	122.74				73.7017	32.6118	37.684	75.7674	54.9572	111.995	44.2975	139.227				31.6597	69.0381	122.818	97.3035	83.8578
181.87	109.275	180.388	101.327	98.814				103.456	126.528	190.295	193.234	130.429	115.118				92.4232	41.3508	70.2984	56.967	69.1648	74.1039	18.8677	181.87				27.8766	56.4698	129.549	94.6127	85.393
161.098	87.8961	178.489	96.3525	90.2514				132.65	158.653	177.417	161.092	144.702	110.467				63.3281	42.0108	79.263	80.1791	61.9692	61.7956	48.1859	161.098				37.379	75.06	108.584	73.9326	68.0187
190.612	94.4135	164.196	72.0661	65.1467				132.535	183.13	163.722	185.055	121.959	115.552				77.7908	46.5498	130.036	116.095	88.3465	61.4697	123.358	190.612				26.9978	56.5087	84.9955	61.8144	73.2487
219.241	111.71	178.445	70.6013	99.2955				134.114	191.968	189.576	179.452	134.622	110.968				69.8331	31.8358	102.159	65.0211	84.9038	55.3879	89.6853	219.241				25.4485	45.9995	103.198	57.5616	76.2389
170.012	95.1298	180.241	101.155	54.4397				133.062	179.636	169.47	193.93	116.489	106.35				77.1188	30.079	101.24	93.1201	62.659	82.4183	110.467	170.012				37.2521	38.1128	130.921	52.5939	68.3674
169.62	107.162	183.376	95.0428	67.9911				136.93	144.469	163.384	197.898	121.626	117.777				80.8346	55.8063	79.9652	77.4756	62.0134	55.0138	81.6331	169.62				59.0272	36.0925	119.703	56.9218	57.1089
164.371	110.421	188.822	111.126	87.0131				119.032	160.019	174.994	204.546	158.142	112.726				86.0979	52.5157	89.7342	56.8766	55.9381	36.3099	36.5108	164.371				53.774	42.6778	90.2189	59.086	61.7838
232.029	119.176	168.583	73.1404	208.146				151.325	143.72	172.021	209.349	139.87	98.4611				89.2402	33.5212	95.404	61.0959	68.0192	28.7076	98.5459	232.029				56.9782	34.422	114.43	62.5482	49.4775
242.57	125.891	186.173	89.9821	163.494				133.153	160.438	162.538	197.324	134.761	112.982				80.536	44.8911	120.51	68.9237	67.5257	33.2691	155.357	242.57				32.2699	34.6745	99.5551	51.653	70.7831
207.412	125.067	176.06	101.551	107.318				153.797	170.665	184.546	225.689	149.783	100.831				58.5534	28.563	90.2834	74.4214	64.393	29.2024	170.548	207.412				32.2526	30.4008	93.1897	59.1799	71.3576
189.711	132.265	185.23	145.54	93.1688				153.682	160.802	175.106	200.56	166.722	102.912				57.5389	37.7571	101.649	53.087	73.272	42.6089	141.066	189.711				28.2808	34.655	115.966	49.2257	51.3916
174.853	124.118	171.35	105.411	144.166				116.126	196.905	173.289	210.166	163.501	114.506				60.9017	36.5889	119.488	56.5371	56.2418	38.5906	146.186	174.853				27.8986	25.684	135.921	65.3896	74.0633
215.226	121.182	174.529	77.3624	97.0053				125.875	169.167	159.495	193.164	152.227	90.2162				61.7637	53.024	108.902	47.6573	62.4438	74.0556	152.069	215.226				21.772	34.4025	144.748	65.4837	48.2128
178.403	128.827	179.755	82.038	166.645				137.09	195.947	148.251	208.217	153.81	117.076				61.9231	36.8563	124.877	55.2363	51.6726	72.7766	120.127	178.403				25.4619	36.0926	118.995	88.6476	53.5369
216.969	111.244	174.132	93.6929	168.775				118.598	188.684	177.037	204.807	141.897	100.197				64.9738	17.425	94.6252	49.9762	53.0776	79.8117	169.51	216.969				33.5184	39.0452	110.955	22.2231	57.0786
211.927	134.718	155.894	73.0713	177.892				124.502	152.041	158.283	200.578	143.119	106.094				59.2525	40.5304	106.693	54.9195	49.4513	74.7798	118.185	211.927				26.5897	29.9434	97.508	32.5724	56.2053
216.791	130.17	172.16	116.819	143.758				137.548	148.778	155.775	204.789	159.28	106.595				39.5979	53.7641	82.4937	44.0488	67.0827	54.0847	116.244	216.791				21.5574	37.0248	97.92	40.6828	54.6345
191.692	124.44	185.466	147.653	165.726				128.965	150.553	170.161	221.6	160.28	103.969				61.465	48.5295	80.2206	38.2232	51.3499	40.0988	159.084	191.692				26.1386	28.3612	76.2796	37.5214	30.2729
176.659	117.296	168.421	119.099	166.193				133.565	159.347	157.522	200.369	147.062	101.198				42.221	56.3234	81.7914	49.2071	64.7348	35.61	157.162	176.659				39.3082	37.7437	107.861	65.0322	43.7034
207.665	131.083	171.644	101.729	112.132				128.347	163.7	180.038	217.336	142.314	104.336				68.3537	77.3155	72.6226	63.0076	51.5397	52.0212	126.52	207.665				39.0246	29.721	100.105	45.688	39.4447
180.278	124.799	162.297	107.709	134.772				130.682	140.722	185.857	187.787	134.705	103.101				60.5793	58.9898	93.5142	56.1186	37.2309	39.5681	167.918	180.278				37.2913	31.0225	88.7239	51.0322	57.8151
198.42	95.2372	182.169	113.464	133.094				141.576	171.371	182.236	214.621	106.992	105.148				55.9541	72.2236	68.9192	47.6119	39.8635	52.4919	176.387	198.42				31.5877	36.1508	101.809	36.7875	49.7782
196.434	127.52	179.814	98.1905	134.261				128.759	146.398	184.997	195.879	119.904	103.813				68.0143	92.3326	91.7137	61.7067	45.4073	46.8082	204.933	196.434				22.502	27.3666	69.8038	62.0589	44.3775
210.002	138.532	195.784	108.8	107.858				122.076	126.671	168.921	205.329	129.79	127.558				83.9431	76.0046	73.6185	57.8267	48.9387	48.0993	179.274	210.002				21.3491	25.9524	60.7572	58.9355	22.2679
189.159	141.647	193.37	110.644	130.614				120.772	149.726	188.012	194.278	118.183	135.569				66.2769	47.3077	92.0584	41.0059	41.3254	40.4007	162.74	189.159				17.2002	28.3806	57.6561	38.5563	27.8056
202.581	143.688	183.994	125.372	91.7102				119.353	134.518	167.596	190.937	149.7	153.628				94.5543	44.0528	97.2301	36.8996			174.85	202.581				17.6302	31.1391	52.7538	30.051	32.6174
