# Supplementary material for: Sequential neuromodulation of Hebbian plasticity offers mechanism for effective reward-based navigation
Source: eLife. 2017 Jul 10;6:e27756. doi: 10.7554/eLife.27756 (PMC5546805; doi:10.7554/eLife.27756)
Supplement: Figure 1—source data 3. — DOI: http://dx.doi.org/10.7554/eLife.27756.005 [file elife-27756-fig1-data3.xlsx]

## Sheet: Figure 1 - figure supplement 2
+ ACh													-ACh
99.2578	112.401	78.4353	95.0254	91.5218	65.8711	67.8634	69.613	75.2713	118.031				92.9479	97.2781	92.474	62.5379	109.813	137.562
110.334	125.242	102.718	97.9799	87.5699	96.3124	86.9364	80.6747	90.7574	86.012				101.88	95.4254	86.9105	81.7141	90.6258	142.006
96.4112	92.1815	111.946	99.8633	83.9045	104.807	98.9085	87.0141	101.833	87.4469				102.236	105.027	112.12	109.502	97.5307	99.4605
104.801	86.909	106.376	102.338	97.2585	99.7812	76.5107	95.0394	91.8334	90.0648				82.9846	101.131	98.4918	106.509	100.457	92.6861
132.219	121.964	108.178	106.29	100.494	102.674	113.303	96.6737	93.9615	96.5841				91.1442	112.463	98.62	108.652	91.5648	97.1307
77.7261	110.691	96.0919	107.287	111.443	104.543	122.492	98.807	111.487	96.7352				94.1035	81.7542	91.5708	113.205	93.291	68.069
92.7192	102.172	89.6846	91.5168	94.204	109.851	107.994	118.591	98.2623	96.0806				109.899	83.9019	103.58	101.283	103.743	99.1155
86.6246	72.089	96.3103	115.375	103.797	94.247	125.546	124.509	118.587	97.3394				107.14	96.8761	115.701	107.663	103.7	86.5587
99.3221	85.0881	119.082	100.454	109.391	95.8282	78.8175	123.476	108.382	114.053				115.375	107.621	96.8136	98.1634	99.9398	115.642
100.585	91.2632	91.1772	83.8719	70.9798	126.086	121.628	105.602	109.626	117.653				102.29	118.523	103.719	110.77	109.334	61.7691
92.366	70.3791	135.865	101.931	82.129	108.821	92.9546	119.838	141.355	126.388				89.7294	70.1711	117.694	107.27	137.12	71.2838
113.079	75.889	105.484	89.1162	102.718	95.2766	117.865	130.59	115.14	149.37				110.515	110.252	122.745	112.013	153.647	68.371
111.008	89.0465	94.126	96.0224	112.865	101.356	103.419	120.285	120.64	108.616				106.551	99.2279	106.61	103.82	145.267	100.885
104.32	80.5757	76.2692	92.9202	118.02	103.826	98.7151	135.536	111.867	131.674				120.446	80.1529	121.654	134.068	164.54	79.2017
122.935	79.8157	98.3672	96.6504	113.247	97.1153	141.539	128.749	113.334	110.051				97.6029	100.76	113.932	127.156	164.682	65.3722
111.115	80.5757	80.1646	84.5366	106.25	158.286	105.442	118.229	123.402	72.8977				93.7741	115.135	113.846	124.417	146.405	92.4703
117.756	78.7391	89.9576	84.0936	110.422	128.323	109.695	123.201	117.141	92.1289				101.421	111.558	136.335	150.518	167.281	101.208
121.817	77.2191	80.383	97.4628	128.214	111.977	73.3534	123.674	107.371	93.2364				116.865	103.881	116.123	120.485	163.482	91.2622
108.413	112.649	88.1736	79.8989	129.184	134.913	96.9625	115.927	128.586	105.463				88.0985	118.525	119.292	102.966	158.741	63.042
110.607	95.4115	81.9665	62.3777	97.5258	124.621	66.317	136.861	127.106	94.0418				94.2061	90.1661	122.045	109.121	182.096	95.2318
115.08	81.2724	111.965	89.8918	104.924	133.691	84.7326	138.4	133.203	132.781				97.6028	140.471	110.533	140.13	153.689	72.1683
111.693	95.4274	90.7221	94.9883	93.7553	153.836	144.928	117.808	114.451	107.307				96.5066	126.639	116.518	120.105	169.273	88.9968
130.175	89.2999	108.087	91.4429	109.582	149.252	70.4924	107.684	129.803	117.326				99.2824	127.622	145.881	137.251	176.614	73.6786
105.855	86.2599	106.558	89.7441	116.827	129.695	102.311	97.6974	128.278	102.676				99.1959	121.528	144.817	136.072	176.661	112.686
138.303	101.903	109.981	94.7667	105.439	136.241	133.265	102.067	133.11	116.696				97.8891	138.543	158.611	137.074	155.065	89.6009
105.208	89.0465	98.1488	88.3406	126.954	118.437	135.173	90.7127	120.383	124.978				99.1905	150.877	175.291	149.364	153.059	123.021
99.5201	76.1424	81.0565	115.19	116.178	128.562	124.528	89.2936	125.28	121.454				107.248	153.74	153.78	140.726	176.187	89.1477
97.904	87.8906	110.272	85.1277	111.701	129.775	119.927	101.405	108.903	104.237				91.1173	161.932	166.676	145.001	141.046	93.549
125.001	90.0123	101.935	90.5196	121.723	145.998	148.769	103.495	100.137	133.536				105.034	175.939	159.584	153.878	179.303	129.579
108.649	85.0883	112.147	90.7044	119.795	133.446	151.655	99.5209	100.072	108.516				112.777	162.959	163.1	135.324	157.374	136.095
102.393	80.0374	125.234	83.9459	123.394	139.042	104.257	89.2935	97.169	110.756				112.275	163.392	150.343	148.438	150.009	99.3095
107.91	77.2824	111.273	69.8378	110.489	151.887	148.678	90.1107	104.15	101.04				112.772	150.431	162.56	149.769	168.794	87.4435
99.6163	95.1899	130.677	82.8379	119.232	120.135	165.11	91.3493	96.0964	117.905				108.808	164.422	178.433	142.971	166.897	100.021
93.8214	89.6799	115.824	83.3549	134.228	151.348	157.016	85.1562	96.7853	120.749				98.4669	169.757	158.948	154.715	155.306	108.134
75.0935	81.4307	103.482	100.048	125.752	147.928	165.367	92.5536	124.108	118.987				100.136	185.676	148.478	160.702	157.9	98.8997
105.385	89.2207	119.191	86.7158	121.303	162.141	156.836	101.577	123.864	103.809				99.5199	172.721	147.418	170.429	169.31	122.33
92.4784	79.3407	120.247	82.6531	114.574	141.873	154.787	109.034	115.04	121.932				93.7741	156.962	150.952	166.688	173.285	117.735
92.2215	85.7057	132.279	97.5366	133.464	117.885	170.561	102.669	111.596	112.77				91.6519	169.317	164.677	165.851	166.456	134.606
102.608	68.1307	119.209	89.4118	118.287	160.271	167.094	99.1596	119.954	109.12				108.166	198.785	147.537	165.635	172.232	118.231
101.639	75.0024	104.174	112.051	103.683	148.664	167.12	100.622	111.216	123.141				93.7687	190.069	163.619	181.945	164.957	103.97
109.462	73.3399	110.053	91.4059	120.912	137.847	156.295	88.9667	128.772	103.859				98.5047	202.754	156.858	128.982	144.589	132.039
94.4153	67.9883	123.05	98.8662	133.216	138.49	153.305	87.0657	107.909	131.296				98.2671	185.315	163.325	190.582	173.185	143.474
81.5841	80.544	124.47	99.7155	133.655	132.98	148.305	72.3655	112.525	125.859				92.9479	188.298	184.916	199.599	158.398	110.356
86.3249	77.5199	126.363	94.213	106.709	141.07	176.424	80.365	107.23	104.488				104.24	195.689	163.362	171.964	172.55	127.745
94.501	79.7682	117.626	101.23	101.363	155.571	151.333	79.2641	108.197	120.145				102.971	166.711	156.056	194.501	177.501	124.315
72.8943	77.8049	128.857	118.514	124.205	138.073	156.784	77.8878	135.687	127.093				86.2247	174.209	188.695	184.279	188.119	126.904
86.785	80.9715	121.849	106.474	126.935	142.051	153.717	72.959	109.252	114.557				81.3753	201.979	175.82	174.272	216.511	150.852
76.1583	87.6215	124.961	88.4884	110.154	150.901	155.547	65.4412	116.589	93.9411				91.83	192.43	175.681	193.626	182.134	118.425
82.574	75.5883	156.798	96.8719	131.813	164.966	151.758	88.0118	117.131	113.424				90.426	173.691	171.758	171.647	186.302	170.054
63.739	67.7032	134.882	89.5225	142.953	154.057	162.648	79.2554	121.301	103.003				101.178	176.9	162.277	176.187	197.575	187.94
65.7402	66.4366	140.488	88.5623	137.225	146.874	167.842	80.5198	127.36	123.367				84.4805	186.175	160.332	189.415	219.826	159.763
90.8249	75.1766	156.962	118.403	142.38	143.558	182.739	76.3653	109.16	106.401				95.7452	180.882	181.357	209.111	214.064	158.252
68.3407	61.7341	152.538	116.667	113.247	164.825	151.243	82.8079	102.22	123.015				114.937	174.762	169.695	200.246	195.057	145.696
80.8617	44.539	157.763	96.6134	108.178	147.689	164.091	84.9927	117.158	101.392				96.9872	181.572	180.384	189.631	114.93	179.568
68.0839	61.4807	143.455	96.2071	91.178	163.17	167.352	94.9104	105.25	118.685				104.92	208.419	189.972	194.919	172.407	118.317
70.4169	70.7115	126.618	115.559	135.593	145.201	159.774	113.309	97.2821	108.239				90.7068	184.954	174.233	204.203	172.199	156.246
73.9912	75.034	131.933	88.0452	123.384	152.727	154.4	109.654	100.942	103.859				90.1992	167.129	194.108	211.572	189.143	142.309
69.0685	65.4866	138.613	99.7525	125.599	186.153	150.895	118.625	115.29	106.326				94.6382	173.713	187.209	242.276	145.423	163.15
76.8004	64.299	147.314	86.2725	131.336	167.73	179.852	110.927	93.3344	130.793				91.5978	181.412	179.641	197.177	155.212	116.721
91.0871	67.2758	129.476	105.071	136.92	160.958	189.634	89.5258	93.3515	132.353				85.9817	185.566	192.676	203.683	141.117	141.359
