# Supplementary material for: Sequential neuromodulation of Hebbian plasticity offers mechanism for effective reward-based navigation
Source: eLife. 2017 Jul 10;6:e27756. doi: 10.7554/eLife.27756 (PMC5546805; doi:10.7554/eLife.27756)
Supplement: Figure 2—source data 1. — DOI: http://dx.doi.org/10.7554/eLife.27756.009 [file elife-27756-fig2-data1.xlsx]

## Sheet: Figure 2
											Figure 2a															Figure 2b
ACh + Atropine													ACh + Atropine + DA										ACh + Atropine + Forskolin										baseline + Atropine
95.4263	107.469	121.54	96.6896	113.009	123.951	98.8238	89.1223	99.3132	127.226				83.9806	98.4896	99.1743	101.218	93.5718	87.4055	119.799				106.058	92.4452	90.4976	75.53	101.61	88.4552	116.624				84.6116	153.096	93.1969	80.4066	94.6663	112.388	86.9632
107.142	122.722	89.7329	73.8417	116.242	93.4928	100.073	52.9526	107.649	91.4113				84.3766	94.8847	89.7743	102.969	88.9471	82.7119	96.6019				105.096	102.86	100.737	83.3789	98.7576	94.5586	86.0822				102.625	181.059	87.4454	88.4927	88.5916	97.7122	101.597
93.9608	88.2439	88.687	84.3118	116.31	101.367	95.3136	93.4301	95.4153	96.0036				90.9812	124.519	117.626	89.0807	88.8204	98.1488	101.167				109.57	117.775	129.646	103.301	129.436	91.1078	93.5017				113.743	100.412	87.8722	76.549	85.3762	114.621	99.1281
99.8795	101.612	121.075	81.2174	107.906	84.8269	106.063	71.3516	81.2018	114.614				83.8486	104.884	109.022	104.144	109.642	94.9152	105.976				102.117	114.849	92.2704	108.545	107.059	99.3111	108.678				93.9338	91.2264	101.97	118.174	88.2726	106.752	107.561
104.267	101.349	108.372	105.506	103.583	98.454	106.975	94.7766	88.0387	105.234				78.1423	84.9764	100.617	100.929	101.575	124.172	67.9721				86.7049	88.6692	74.0161	110.614	86.7433	97.1866	98.1388				120.995	88.0206	97.8074	110.353	101.796	94.2522	122.711
92.1864	89.2639	98.2455	110.381	76.933	95.1381	87.7196	129.869	111.488	119.229				60.575	90.3636	103.551	91.5948	96.296	91.9948	94.7758				99.5166	95.3716	107.545	118.571	94.4815	111.321	127.564				125.889	49.5896	109.78	107.796	118.961	77.1763	95.7511
98.988	81.2896	85.3495	116.655	82.7176	94.2884	105.743	104.021	103.751	100.002				89.3432	91.4611	97.1848	89.6577	106.791	102.008	109.014				82.4445	80.0478	106.489	104.213	136.485	109.921	110.765				124.203	73.2006	116.516	116.14	85.2607	99.8326	99.1654
98.9663	105.553	98.4934	101.31	79.7758	90.321	106.08	109.226	103.092	99.8895				146.325	116.212	76.6935	95.9838	102.462	113.377	106.907				94.6131	108.839	80.3711	100.278	75.4827	96.3761	100.71				100.884	120.645	108.701	88.9238	112.746	104.52	104.725
108.138	97.4856	86.9035	126.489	83.0521	112.362	103.768	136.151	106.87	91.2685				145.797	103.061	120.263	101.506	105.355	118.957	100.218				110.773	86.7184	101.605	99.0661	89.0931	97.4445	91.6257				121.201	98.8338	113.673	107.146	115.834	119.42	122.668
101.045	105.012	101.601	103.599	101.725	96.9023	89.4409	119.099	103.182	106.722				136.63	116.131	86.0937	122.916	106.538	86.3102	97.5691				103.106	112.426	116.823	96.5034	80.8525	114.318	66.3111				107.314	91.8921	120.551	106.019	108.494	131.585	97.2001
87.1766	67.3034	100.489	105.294	61.2331	110.925	84.5132	105.098	93.8859	89.0137				122.84	117.571	93.7035	92.3984	101.322	105.137	91.7835				104.603	94.333	107.054	89.8982	93.239	118.677	73.0561				100.021	112.877	117.247	71.5868	113.503	92.6896	95.154
93.4389	52.7764	94.0859	103.472	82.73	75.1924	85.5257	135.882	84.2903	90.8176				112.828	101.672	106.635	94.8711	87.0042	131.682	101.095				91.3645	127.844	110.487	89.4479	84.3981	99.09	72.9717				111.399	105.948	110.934	97.4184	125.897	115.234	106.33
96.2265	80.6713	90.6398	113.094	80.6491	90.6162	111.599	117.753	117.065	115.756				106.805	111.973	98.0305	99.2396	95.937	141.486	113.181				97.8064	116.076	115.069	94.3159	100.219	111.493	83.1524				110.151	81.5722	114.548	92.9102	135.803	88.8952	105.167
92.7649	75.4787	93.3544	98.258	78.3823	95.7574	100.224	115.598	72.1462	104.166				113.436	102.679	124.838	83.8674	93.1706	136.48	98.3918				88.7893	114.974	77.2785	104.706	100.535	97.1129	87.5365				102.392	138.276	95.661	109.423	135.245	95.8147	103.289
91.5602	73.4078	98.9951	72.3158	79.0202	71.3366	86.7915	104.469	105.011	74.9059				97.9024	92.9816	108.525	79.5194	105.229	138.044	101.104				93.3796	96.8502	101.548	109.478	101.494	93.1832	97.2535				87.0382	133.689	111.696	90.4972	117.533	94.0291	87.8091
90.2947	77.7968	85.3436	72.3159	69.5197	84.2796	93.9299	95.4048	105.161	90.374				94.9964	86.4565	105.541	77.9534	109.727	120.991	130.231				106.815	99.2102	97.6259	100.417	80.7315	101.3	109.373				93.9749	75.4446	91.8689	121.336	102.946	105.357	99.9179
85.15	86.2195	95.1863	86.3041	69.0985	65.6696	80.3787	104.021	113.407	87.2398				83.1353	82.1972	130.11	78.3862	117.266	97.314	117.982				102.438	100.721	84.9346	107.258	80.7128	111.174	124.908				89.026	95.6279	101.708	81.5867	129.639	95.1451	105.739
110.547	77.1014	82.2904	69.8148	57.2558	72.6215	73.8141	110.573	124.022	80.5931				84.9292	84.8494	81.1699	70.9061	104.532	117.757	115.378				104.176	84.2956	67.2651	83.4861	76.6088	94.6937	82.9416				113.318	91.6826	122.798	108.144	166.696	104.52	93.4562
93.6448	70.1377	88.7021	94.0401	55.6901	90.5765	75.0854	77.3287	106.96	57.0175				82.4222	77.686	98.0302	65.9164	111.135	84.094	91.2803				61.148	85.7118	114.978	97.4684	72.8343	103.523	71.9601				96.3878	70.488	106.463	118.333	145.008	119.81	89.4634
90.5644	55.0327	87.2178	89.78	66.1382	66.8362	58.5078	65.4277	89.3979	58.4229				119.591	99.6879	104.222	83.6613	145.605	124.12	85.347				86.3113	111.419	89.2153	118.335	48.0992	81.2566	72.5923				96.2916	94.3949	96.4709	94.718	144.719	88.5045	113.675
94.513	73.0214	97.1633	86.516	82.1354	60.3124	69.477	46.6702	74.575	75.9431				117.927	85.3791	85.7952	80.6528	126.811	106.075	104.91				84.6703	101.948	93.7789	112.201	69.1173	100.072	99.235				82.1853	100.387	111.809	63.4025	94.7322	73.6606	92.8342
45.093	88.9857	72.8347	96.6047	66.8132	73.9971	83.1125	59.6842	95.895	85.4134				111.534	97.8149	99.075	73.317	134.202	143.52	93.3202				116.045	101.476	98.3992	114.206	75.5712	95.2586	86.1666				91.6993	105.331	109.071	89.8845	101.572	93.3593	83.6235
84.1063	71.2597	68.796	86.6856	72.8889	70.9765	84.2263	33.8356	94.0359	64.3156				134.728	109.647	112.255	85.5777	122.756	109.1	76.1714				103.686	111.041	82.0495	102.09	70.8854	95.1357	115.718				85.3657	114.172	122.946	74.8622	125.17	81.9195	84.0837
89.8816	84.5967	98.3906	73.0787	74.8584	68.2006	68.6164	58.7865	89.7479	65.1574				120.436	114.852	100.865	89.9875	127.107	122.19	95.1555				140.266	115.446	94.948	113.177	76.9717	97.2603	148.346				88.8204	54.287	89.6224	82.5322	84.8075	90.234	84.5067
95.3742	91.304	96.2685	84.7781	83.9253	73.3132	85.222	20.2834	89.8978	62.4741				107.835	104.028	124.142	78.3243	133.188	111.917	102.189				120.037	129.763	90.1394	97.565	62.5983	99.8023	142.634				68.1335	84.63	108.439	84.8014	101.984	63.6161	90.6327
98.8055	81.5212	76.4803	68.7975	52.259	79.1492	64.8699	36.977	82.7012	79.5884				130.422	94.0187	151.994	97.4263	129.767	89.4914	103.319				139.867	124.194	74.5631	98.0045	138.947	96.1305	153.763				85.1464	107.637	94.5942	108.114	77.644	104.799	107.692
85.5023	98.521	78.8322	69.5181	67.0114	80.4525	77.4086	25.9377	86.8093	71.3507				117.398	111.721	165.771	96.1693	147.316	103.625	99.6302				128.33	119.379	105.791	126.484	140.729	92.7902	132.791				73.5349	50.6499	102.867	114.808	114.914	104.408	86.4222
96.0221	80.3158	84.7149	54.3852	66.0081	77.4714	76.4129	46.3113	95.0553	93.7413				118.032	110.241	153.089	117.146	137.011	107.797	85.2205				144.069	137.315	93.0811	102.487	139.7	105.574	180.279				101.172	110.608	102.17	99.0068	108.23	79.9666	104.184
89.8599	92.6638	72.3813	53.6646	66.9557	62.487	70.7259	72.4283	106.75	78.1528				132.588	120.018	159.604	155.247	138.51	103.677	92.2265				133.181	107.58	98.5309	124.318	147.964	97.1743	195.392				81.4724	57.9119	98.6738	108.243	70.9038	91.6296	101.379
89.5728	85.1995	78.9471	52.181	101.099	55.3727	71.8734	101.687	103.781	73.3575				112.247	96.5563	163.484	148.921	141.699	118.435	80.6191				129.201	119.694	90.441	93.426	135.14	105.279	192.779				84.6393	25.3373	94.2808	113.258	62.731	88.2255	118.066
86.0372	93.0347	69.0198	73.3757	72.6535	50.4367	68.7851	103.841	92.1766	67.2394				130.766	110.976	178.852	147.19	141.488	91.8904	90.7982				124.841	137	91.6669	85.62	134.256	106.79	200.957				84.4335	82.3367	108.875	108.091	91.2	79.2411	119.583
106.746	92.4475	87.0364	50.6126	76.3447	51.8625	73.0208	55.8248	108.429	84.5415				110.873	122.515	144.086	141.235	141.255	113.69	80.1038				126.39	152.953	97.324	96.8358	155.572	111.727	189.027				78.2645	115.528	100.816	90.6182	75.4055	101.674	112.767
94.9698	83.4686	97.1028	62.0152	70.2629	64.0495	59.4698	72.4287	101.712	92.5913				121.361	124.821	169.253	133.24	131.879	100.913	86.5674				144.18	145.779	91.4783	84.419	153.241	107.662	245.811				88.1898	160.161	112.584	102.085	105.629	66.6853	106.977
92.5561	58.7417	96.728	75.6221	89.7222	61.8425	69.4939	64.8895	89.1481	92.7266				139.166	147.76	184.323	139.855	125.248	124.433	79.2902				140.743	161.575	80.6729	113.027	164.39	108.534	232.911				92.7959	200.737	118.161	97.8874	85.1638	103.515	75.6443
81.3796	72.496	106.383	59.2599	77.9797	61.5761	62.7436	52.3248	89.2082	87.7133				161.621	147.901	162.091	142.822	118.195	106.336	86.7392				159.487	163.683	102.887	88.1076	143.469	103.167	225.934				81.9796	73.3608	124.148	62.1696	86.5705	109.766	91.9884
78.8747	90.7629	119.733	58.2425	81.8691	74.7964	49.7663	31.5022	88.7283	75.0562				141.861	148.696	169.999	146.716	118.258	115.88	98.2653				159.495	171.832	97.9275	107.934	142.571	110.56	210.99				80.9789	102.767	104.739	88.1372	91.0064	114.453	92.9897
88.5074	61.1371	117.508	34.4198	83.1387	65.9972	56.0609	50.3498	87.7687	89.8629				139.272	176.337	153.536	149.993	115.703	134.602	82.9062				137.167	154.841	88.4798	65.3328	144.805	119.058	210.969				91.3702	113.099	123.055	125.466	83.2557	113.839	88.5243
104.32	60.6889	125.911	57.522	100.387	59.9812	58.6935	63.6331	87.8588	82.4069				148.914	160.457	154.183	141.874	126.769	107.066	95.0832				138.151	144.583	105.829	77.3636	155.516	123.479	220.18				92.0282	143.553	83.8449	145.443	77.2442	107.143	108.326
104.594	69.7298	113.826	47.2213	74.047	75.3977	48.2474	42.9905	77.6036	78.0927				158.107	158.947	159.853	146.119	142.797	99.5046	94.2424				143.515	131.934	111.58	126.902	175.562	110.707	229.433				89.9719	171.677	98.8611	102.04	82.1793	71.4843	102.947
109.308	58.4481	133.705	69.6027	91.605	62.9442	61.3092	90.0198	72.6559	79.423				168.331	138.677	158.958	153.413	124.382	128.918	87.833				125.054	151.443	111.241	118.935	165.786	122.84	292.562				82.7062	97.7362	117.987	118.454	53.9324	58.3704	106.1
87.7811	71.3524	113.058	45.5683	54.4948	76.9926	61.1236	54.1195	76.0443	77.8822				155.519	189.437	155.227	142.574	141.34	135.698	102.107				137.12	136.622	109.996	114.464	159.16	109.553	280.168				91.4937	107.144	90.5367	125.95	85.5598	33.0916	126.256
81.658	82.4795	121.885	74.8166	66.2992	63.5239	48.1125	81.4932	58.8623	67.277				148.544	194.432	149.756	151.786	141.994	144.667	98.1025				130.199	112.457	106.602	131.309	154.451	111.96	224.838				86.4486	110.855	84.4892	125.761	81.5125	63.616	109.949
74.6215	90.5002	105.065	62.6935	73.1304	79.7144	33.92	82.0319	66.089	62.7597				129.762	181.17	146.374	153.578	131.119	113.638	95.6888				133.824	117.68	97.0601	129.229	204.951	123.724	255.612				78.7031	81.9668	73.9749	126.79	75.1697	73.9957	102.406
78.9486	81.9541	97.254	78.7166	66.8195	85.7594	39.3201	59.0557	69.0875	87.2924				116.553	178.693	151.248	147.232	132.956	127.145	89.5507				134.185	127.875	96.9092	117.423	205.128	132.824	204.203				78.9362	82.0037	71.4802	154.747	68.4569	96.3169	100.82
88.9944	73.0369	131.044	89.3986	70.6098	95.7322	40.4678	65.2487	70.6767	71.0351				145.163	174.564	165.423	157.432	129.007	131.943	77.6449				127.382	136.119	95.8909	125.143	204.22	135.231	212.929				70.8343	72.436	82.7347	110.83	71.8164	91.1272	89.7371
98.5619	63.2544	116.951	73.5026	79.751	81.5289	49.2769	66.2362	52.4753	69.4191				110.266	190.615	145.877	129.139	136.546	143.937	89.4693				125.733	135.49	100.209	112.609	226.574	116.344	201.484				69.436	139.534	57.226	96.2762	70.8703	75.7812	96.0185
91.7212	62.2962	118.535	76.4275	57.74	76.7046	51.2175	52.684	53.075	94.5681				128.52	196.023	169.8	135.898	155.932	119.531	91.5213				126.554	127.277	112.391	118.699	207.734	140.745	263.558				86.2293	109.98	84.2977	72.313	77.9022	86.3839	103.401
78.9835	63.208	124.194	67.441	60.6076	81.1905	52.247	69.4667	67.3484	91.8096				150.103	192.136	122.551	116.075	155.7	145.241	86.1064				124.228	134.514	98.776	151.532	232.293	120.789	206.437				70.2585	101.004	70.1348	87.8951	85.3438	89.9553	82.7964
89.3206	81.6141	123.584	89.6953	82.3955	89.4388	48.9056	101.238	76.1042	77.3035				145.189	148.625	116.532	132.271	151.054	139.609	81.3241				91.6666	118.09	92.7228	129.872	203.08	136.336	197.121				82.8981	118.216	65.7506	82.5624	77.495	83.4264	99.9614
69.8161	74.9069	131.014	58.7089	67.0299	78.3931	28.9586	78.2625	71.0666	71.5462				160.591	201.671	115.637	143.316	152.173	141.382	82.2734				114.468	138.699	80.3334	159.391	174.31	130.073	173.598				80.2523	130.742	60.9485	84.3703	78.8011	83.4821	113.874
81.371	58.0308	110.549	84.0998	88.0067	81.8746	44.8218	70.0054	57.0332	89.3518				185.053	174.806	121.058	138.989	133.674	102.738	90.3913				111.136	128.473	86.8203	174.435	207.194	134.261	201.505				84.4883	99.45	71.0972	81.927	81.5535	92.1875	108.388
100.641	49.2218	98.4268	60.5741	77.8435	64.1214	35.827	79.2495	66.2389	95.5227				187.166	199.335	117.229	136.537	140.77	118.123	95.5984				106.937	133.319	81.0689	141.624	183.495	137.208	256.223				85.2149	112.322	75.7817	73.4779	67.0998	85.6585	118.097
85.5023	57.1808	135.887	76.385	58.4461	73.9432	30.2074	69.7362	56.9132	110.149				185.132	233.612	135.88	149.993	133.083	124.328	95.6165				126.634	130.266	94.9481	134.193	188.339	130.368	252.05				77.6338	95.7636	89.3786	82.6835	64.7509	103.962	107.63
93.7129	59.1282	126.057	73.6297	68.4359	71.2537	42.3916	86.8782	57.1831	83.2713				188.725	181.301	120.959	144.244	141.255	128.866	89.2252				115.771	148.957	95.0423	148.454	185.72	120.372	192.062				74.0695	85.2959	71.0884	89.3777	80.2984	99.2747	101.149
89.5685	54.7855	129.043	93.5525	74.5796	69.0575	51.6057	111.29	63.9301	99.1379				203.915	182.338	145.529	140.967	140.854	129.544	90.5901				129.533	147.572	82.1438	120.844	148.709	115.619	208.861				99.3762	119.929	65.128	62.5099	69.8871	75.6696	67.6837
65.2194	61.2453	121.038	118.816	65.9462	62.1846	25.921	77.4547	73.3755	71.02				187.906	189.578	127.524	147.541	154.855	118.279	85.2024				118.937	155.281	78.2593	128.071	170.011	137.564	199.903				90.8219	72.8554	42.9282	92.2823	44.7788	99.442	90.3901
106.433	46.8265	127.248	100.674	93.0542	79.9808	29.4648	104.111	70.1371	96.3945				213.557	200.332	105.093	172.763	145.838	119.165	86.7482				106.643	142.381	88.5554	117.434	189.749	130.454	222.035				95.3322	83.8039	73.8182	66.6248	66.4058	85.7143	72.5658
86.5504	65.2171	130.416	93.0441	97.9283	87.7108	16.42	141.357	51.2458	79.5358				227.691	185.52	113.847	176.204	155.467	126.884	72.7144				134.382	130.204	100.983	116.115	172.23	125.002	209.662				109.905	102.705	95.3389	74.9302	52.3731	106.752	72.0496
82.6712	70.4715	112.054	98.7666	88.6756	72.7047	19.137	92.802	61.1412	85.2556				214.508	218.951	114.394	149.004	159.522	134.185					137.386	145.873	79.7299	111.611	152.878	122.14	195.456				83.2682	82.9655	80.031	68.1754	58.2963	82.3102	92.5171
91.6602	51.0147	118.112	90.7125	79.0388	67.5562	31.1693	69.4671	65.3993	92.1103				210.097	199.638	120.66	194.317	156.016	101.017					120.311	148.391	95.9098	121.037	211.153	121.146	237.864				112.66	112.162	93.0226	49.9157	51.4804	105.469	76.2538
