# Supplementary material for: Sequential neuromodulation of Hebbian plasticity offers mechanism for effective reward-based navigation
Source: eLife. 2017 Jul 10;6:e27756. doi: 10.7554/eLife.27756 (PMC5546805; doi:10.7554/eLife.27756)
Supplement: Figure 2—source data 2. — DOI: http://dx.doi.org/10.7554/eLife.27756.010 [file elife-27756-fig2-data2.xlsx]

## Sheet: Figure 2 - figure supplement 1
+ ACh after pairing; + 10ms
81.6627	82.9228	114.462	80.9882	109.177
97.4855	85.6481	111.498	77.5737	104.529
111.774	76.2663	84.9611	100.861	89.6777
84.341	107.119	85.9222	123.209	98.6497
99.5918	114.403	102.988	113.618	98.1926
102.205	103.073	92.0726	99.9596	97.6264
104.22	112.274	102.874	115.92	106.734
98.3436	94.7465	91.8775	87.7022	100.915
114.505	104.213	96.7911	108.035	93.0268
105.871	119.335	116.553	92.1332	101.473
76.6051	149.742	115.7	138.862	106.492
103.973	138.357	124.981	154.284	114.625
99.1757	144.357	153.037	150.026	137.263
95.5743	153.895	174.701	150.218	100.168
114.881	138.231	156.398	134.066	129.309
127.051	130.857	172.92	158.121	127.161
94.2351	134.909	143.795	148.683	93.9495
92.1418	137.929	165.95	156.567	138.436
104.168	128.65	205.479	169.151	112.219
70.5334	118.913	164.249	186.281	127.391
68.7521	137.363	135.891	137.48	104.419
81.0645	119.956	132.853	118.241	154.357
90.2046	104.195	161.177	182.617	112.995
116.715	124.243	168.027	153.133	144.148
92.4539	116.784	197.346	166.561	132.284
98.0706	133.799	152.816	146.746	136.036
119.042	133.317	157.118	158.504	153.313
110.162	136.06	141.691	173.352	136.976
122.994	128.903	184.75	193.935	159.175
122.839	136.108	160.909	159.214	159.798
172.764	123.392	147.774	142.161	131.537
128.377	125.961	157.561	129.539	144.965
142.523	112.636	135.588	170.436	146.051
153.964	106.239	148.285	170.801	155.46
148.373	129.325	107.774	203.084	121.524
144.447	116.121	171.623	185.935	117.66
135.749	123.706	153.468	181.025	136.042
139.975	126.19	154.557	158.639	123.821
131.445	126.528	171.354	151.925	98.2415
161.18	121.963	148.386	203.391	93.9984
150.61	112.473	143.082	172.546	99.3598
133.006	130.941	172.738	178.838	121.573
139.676	127.613	131.467	146.189	115.205
140	127.921	169.895	138.881	135.676
158.203	127.426	169.136	171.664	96.4477
146.085	137.748	150.913	173.486	92.1758
147.996	133.811	167.623	191.767	91.0805
163.156	140.902	147.741	201.972	92.4202
134.345	154.052	169.129	219.601	86.8144
144.577	177.163	162.38	198.999	106.564
145.89	154.878	159.544	220.234	140.949
141.925	154.8	173.31	191.287	137.559
