# Supplementary figures and images for: Sequential neuromodulation of Hebbian plasticity offers mechanism for effective reward-based navigation
Source: eLife journal article supplement (doi:10.7554/elife.27756), 2017-07-10

**a Initial reward location**

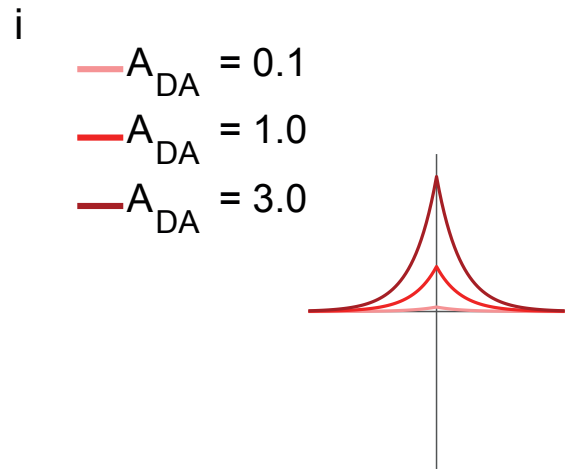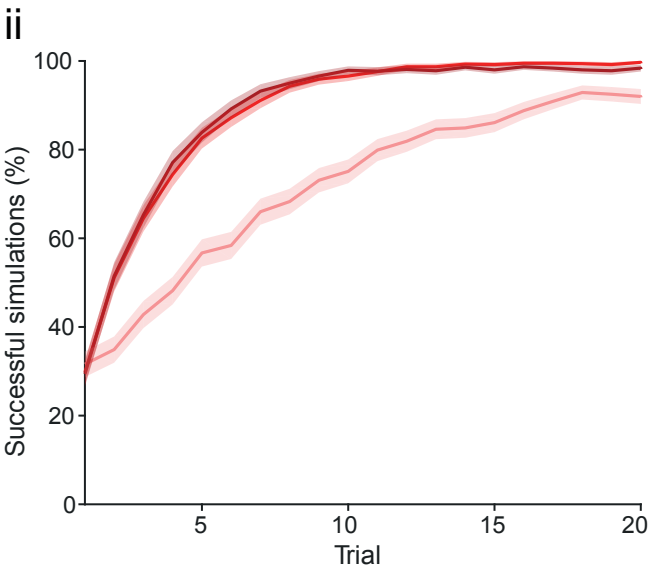

**b Novel reward location**

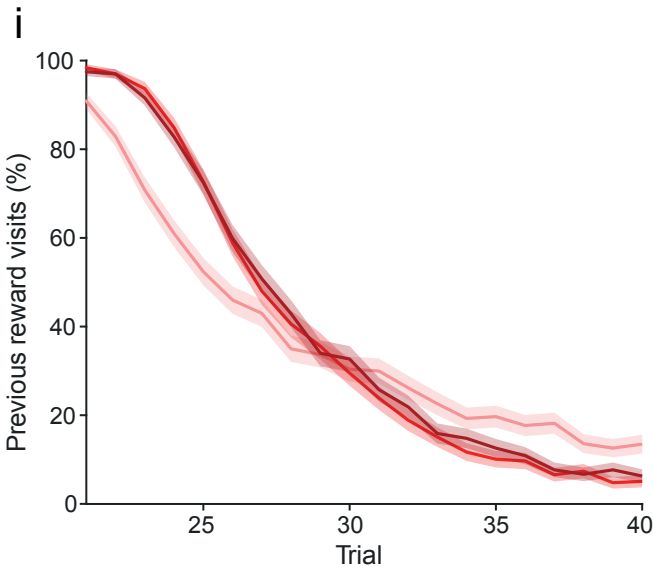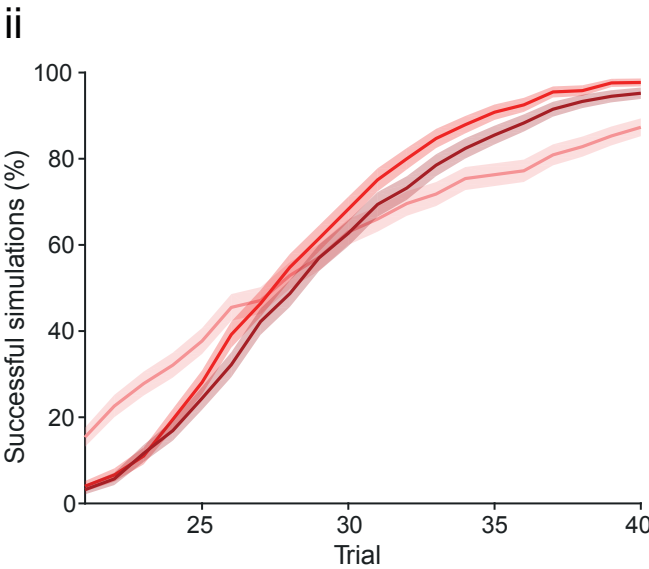

Supplement: supp [file elife-27756-supp-v1.zip]

**a Initial reward location**

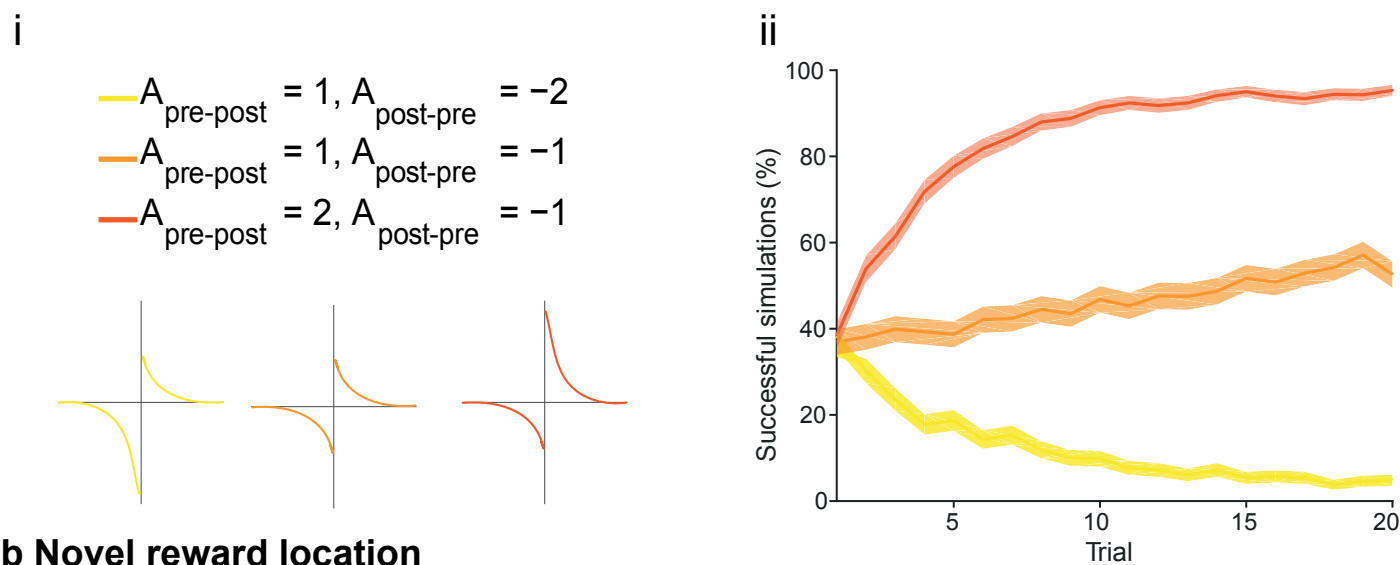

**b Novel reward location**

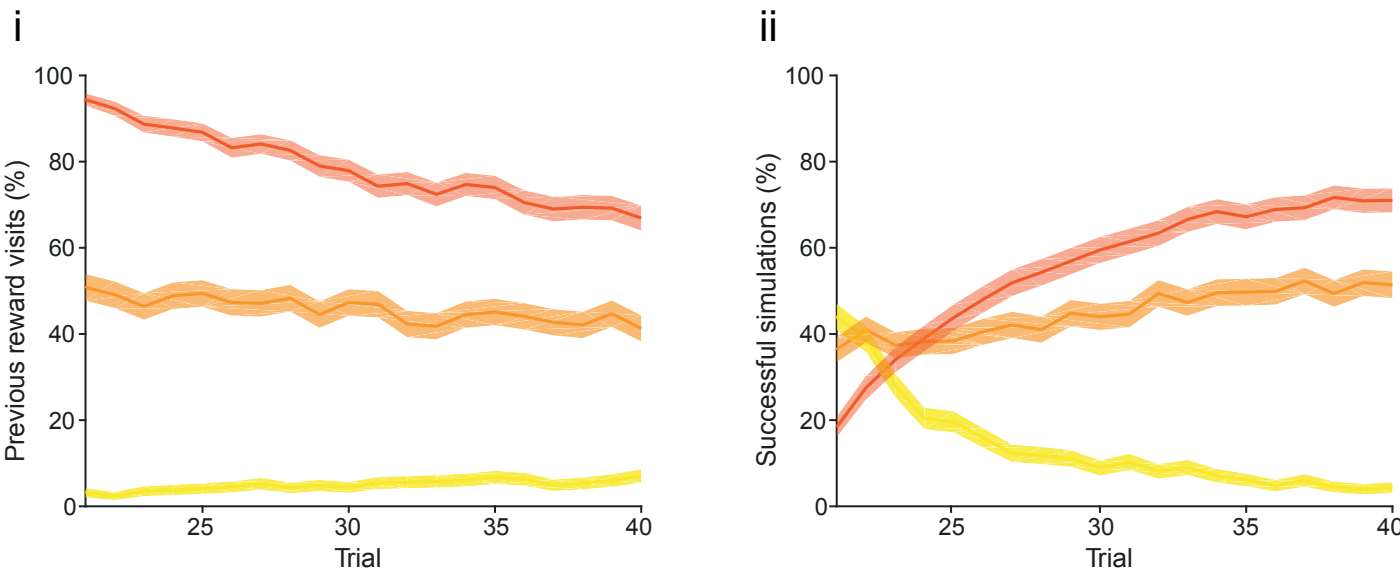

Supplement: supp [file elife-27756-supp-v1.zip]

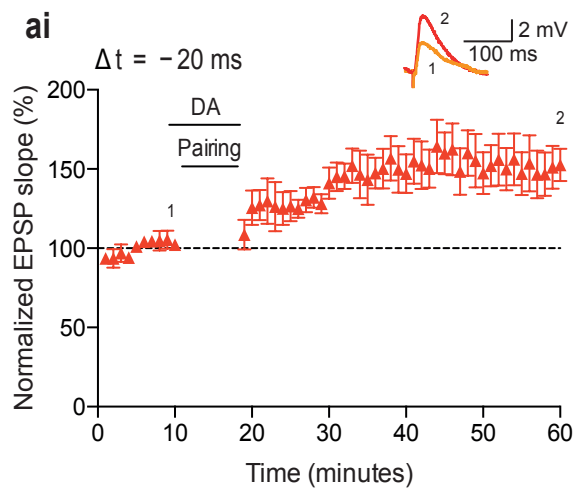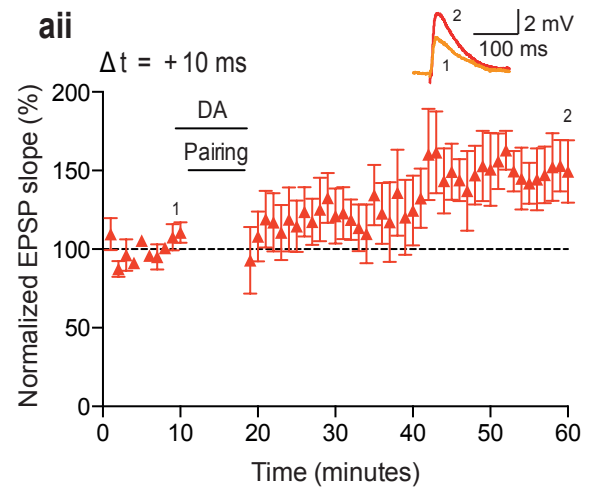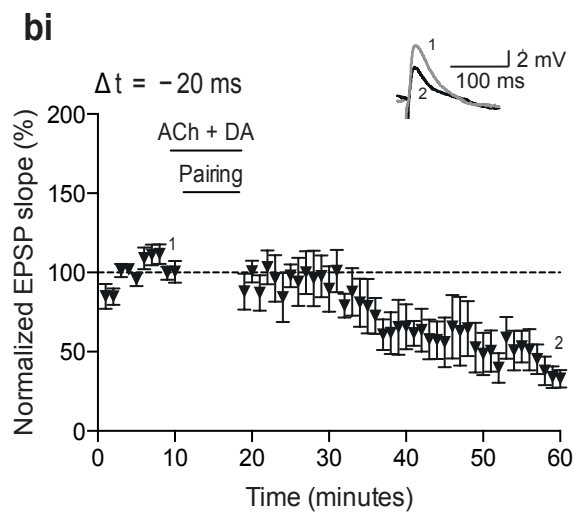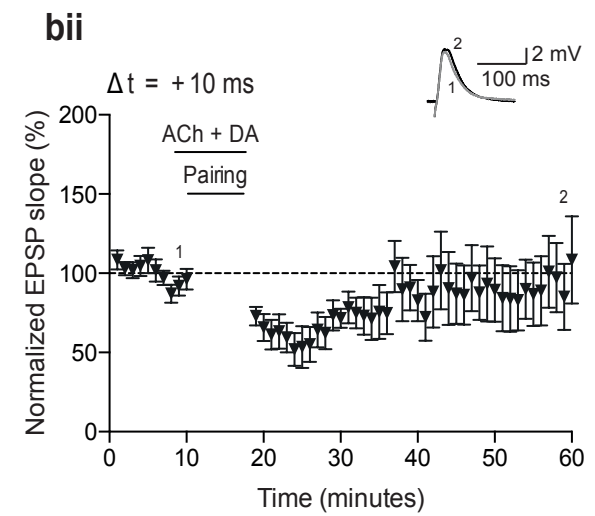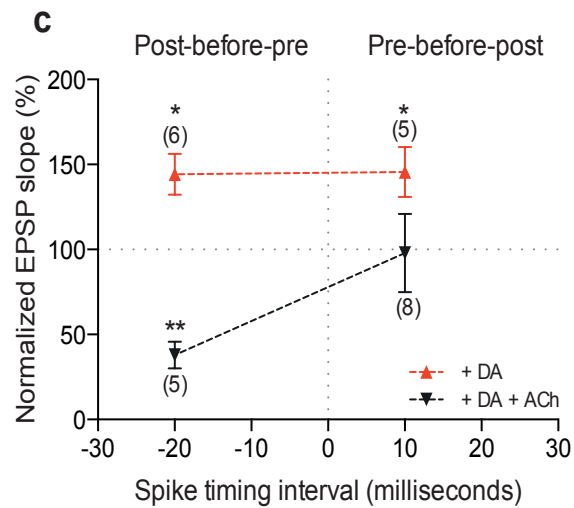

Supplement: supp [file elife-27756-supp-v1.zip]

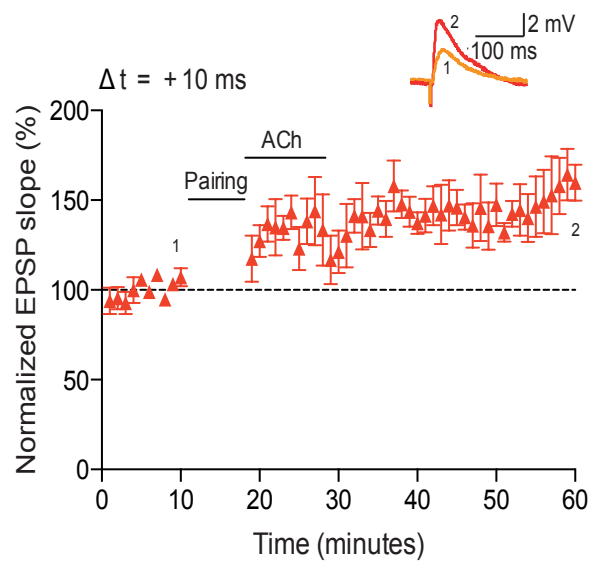

Supplement: supp [file elife-27756-supp-v1.zip]

## a Initial reward location

i

—  $A_{\text{ACh}} = -0.5$   
—  $A_{\text{ACh}} = -1.0$   
—  $A_{\text{ACh}} = -1.5$

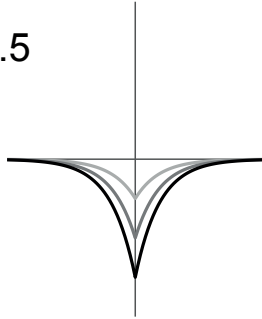

ii

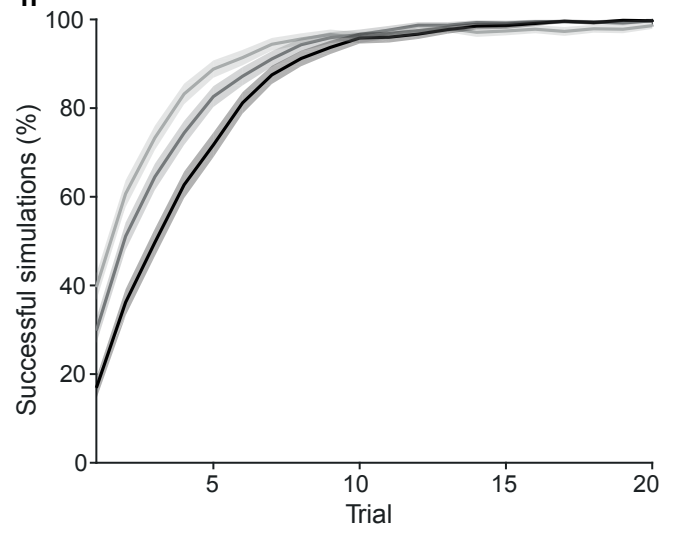

## b Novel reward location

i

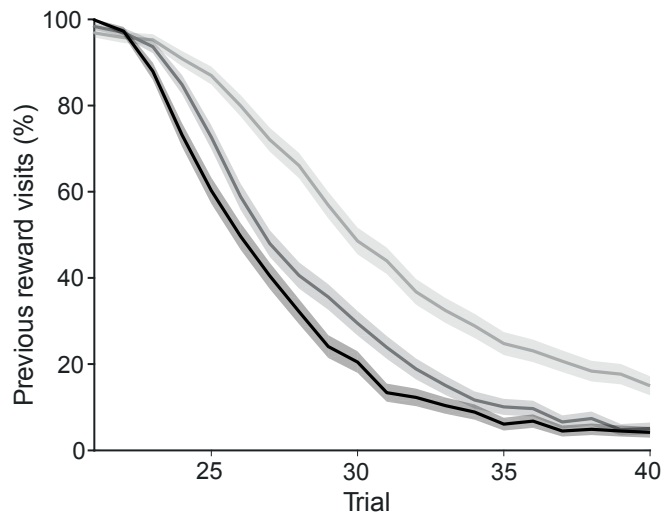

ii

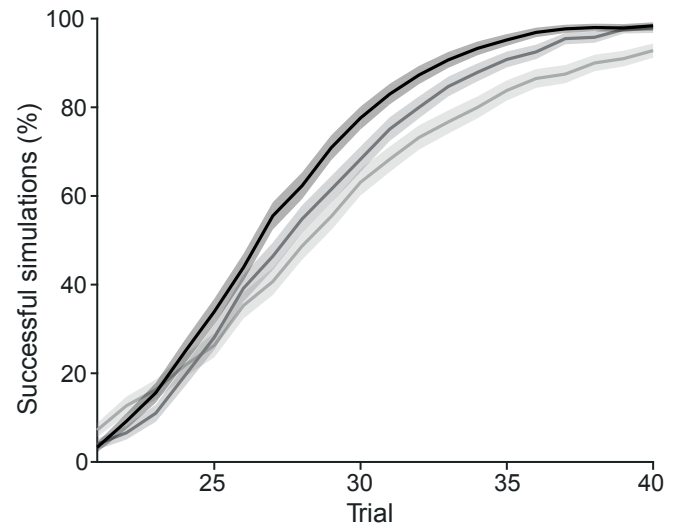

Supplement: supp [file elife-27756-supp-v1.zip]

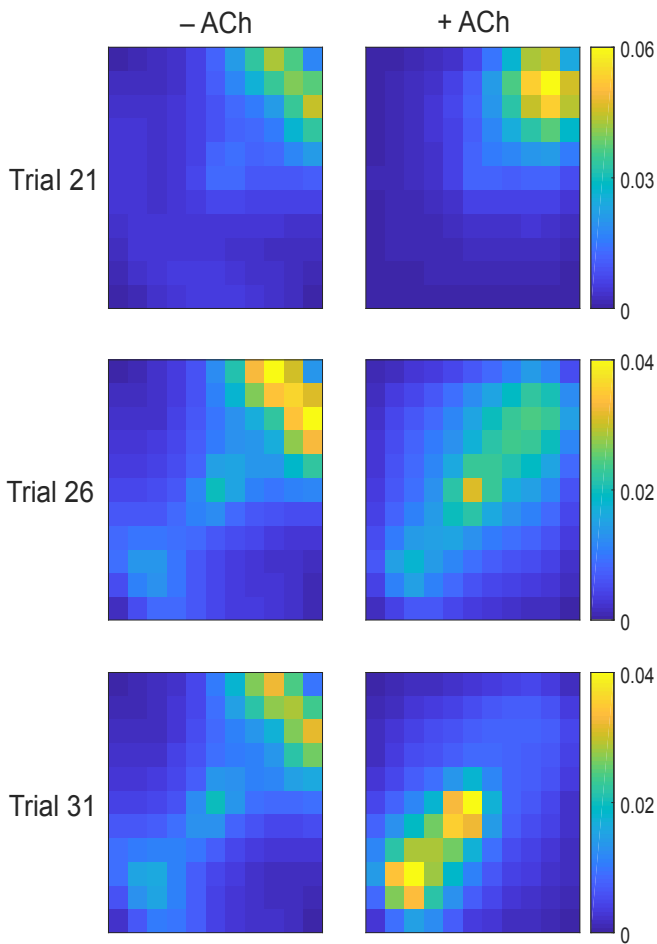

Supplement: supp [file elife-27756-supp-v1.zip]

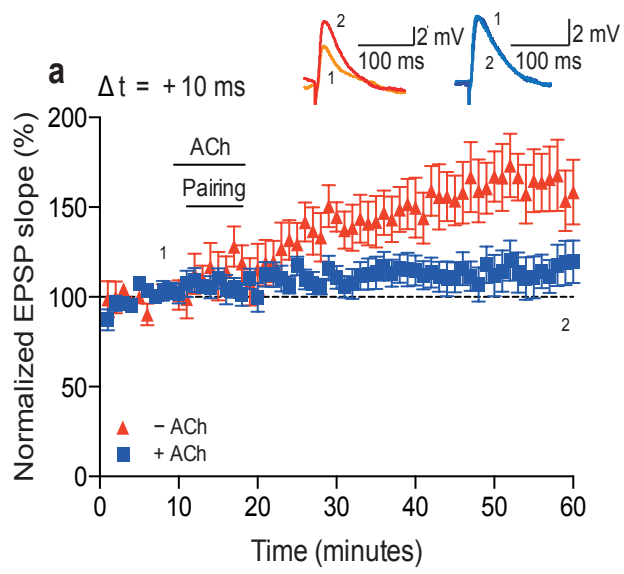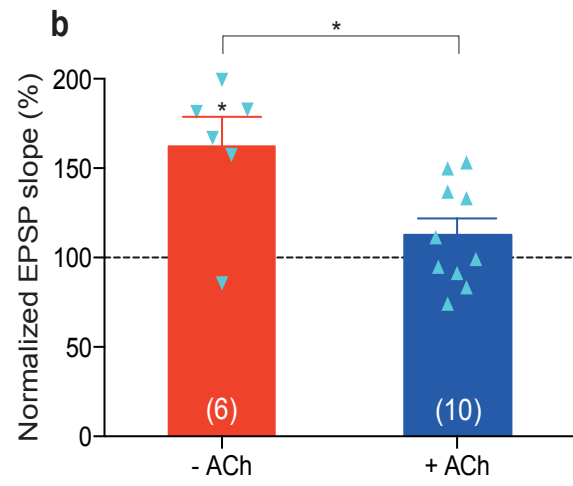

Supplement: supp [file elife-27756-supp-v1.zip]
